# Supplementary material for: Exploring the bi-directional relationship between periodontitis and dyslipidemia: a comprehensive systematic review and meta-analysis
Source: PubMed Central journal article supplement (PMC11059608; doi:10.1186/s12903-023-03668-7), 2024-04-29
Supplement: 12903_2023_3668_MOESM8_ESM.pdf [file 12903_2023_3668_MOESM8_ESM.pdf]

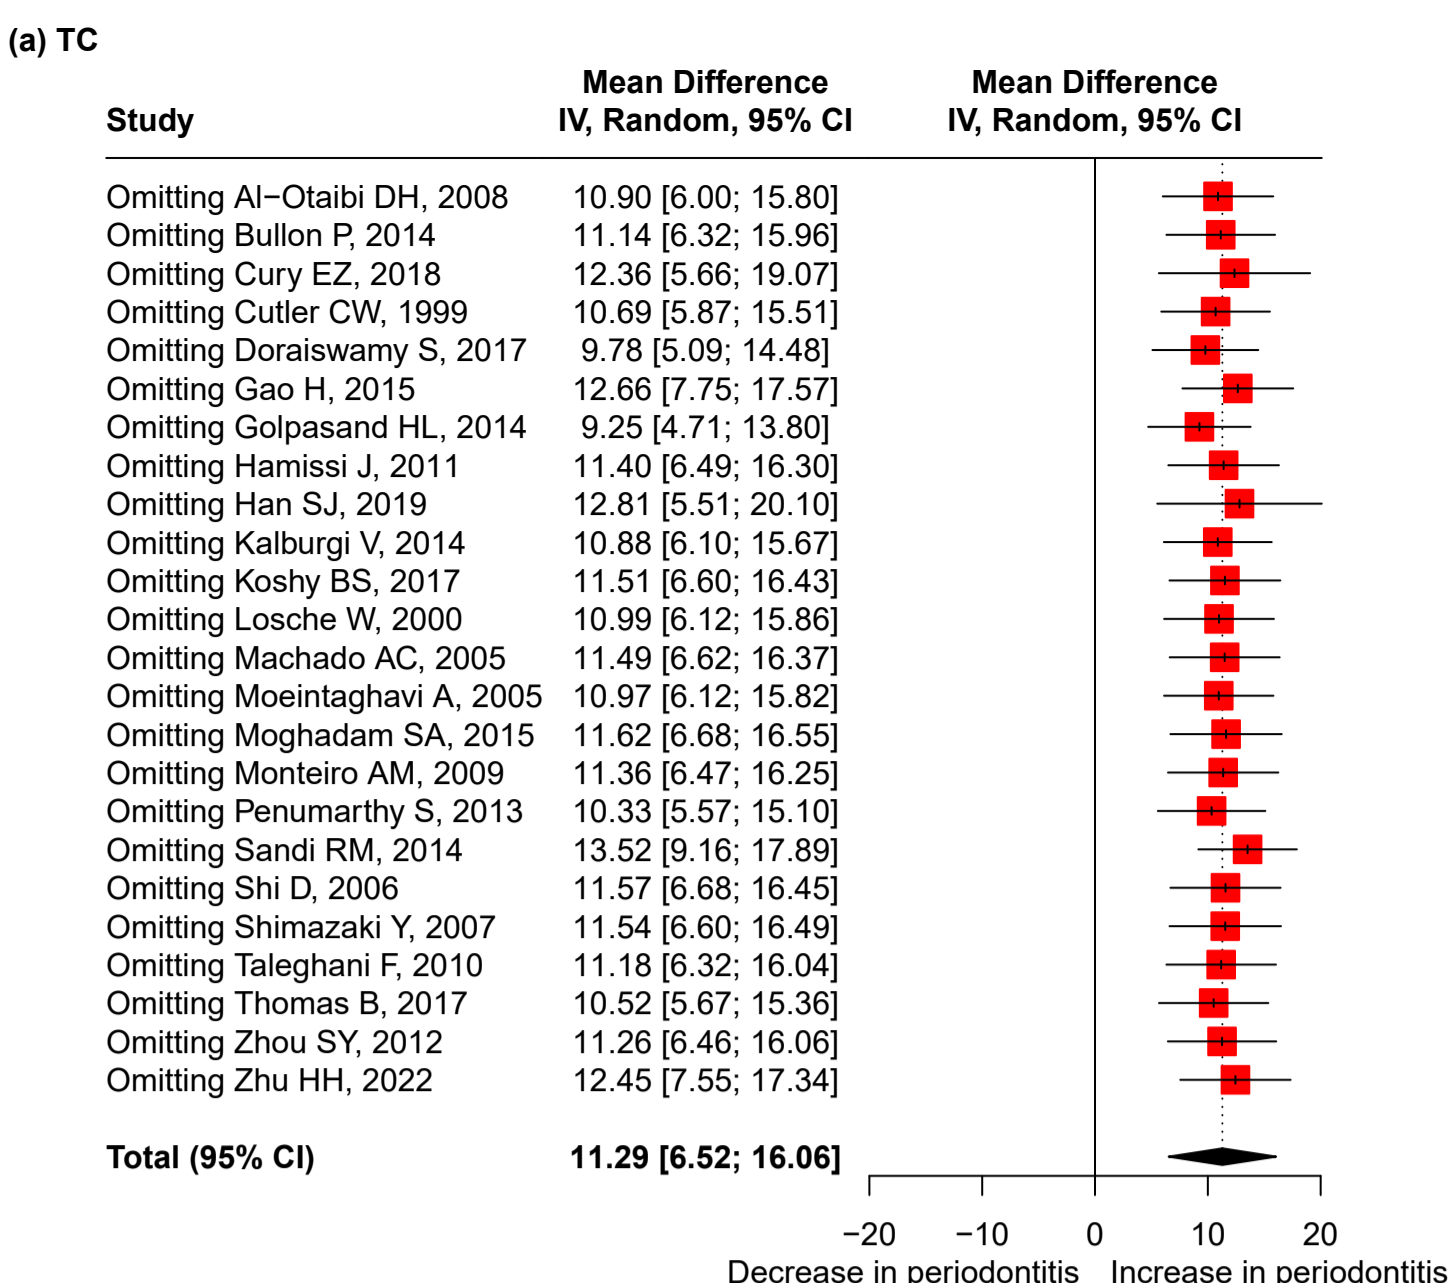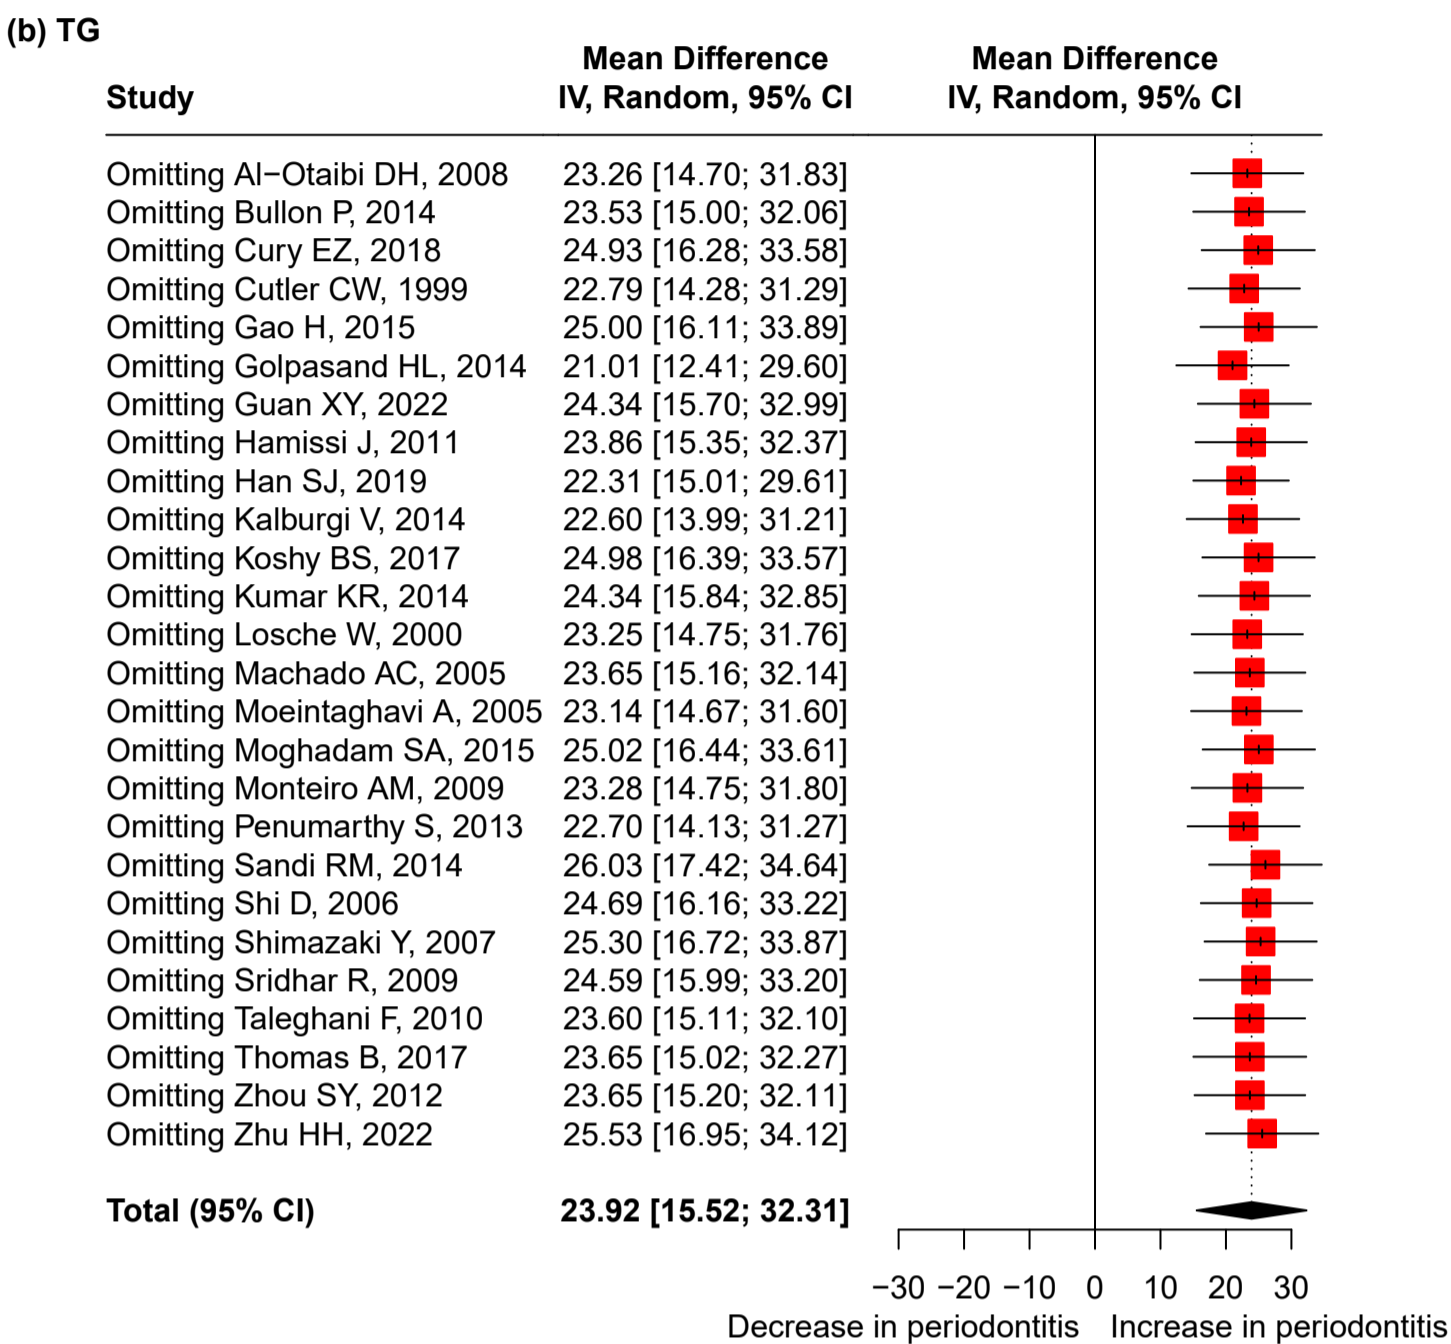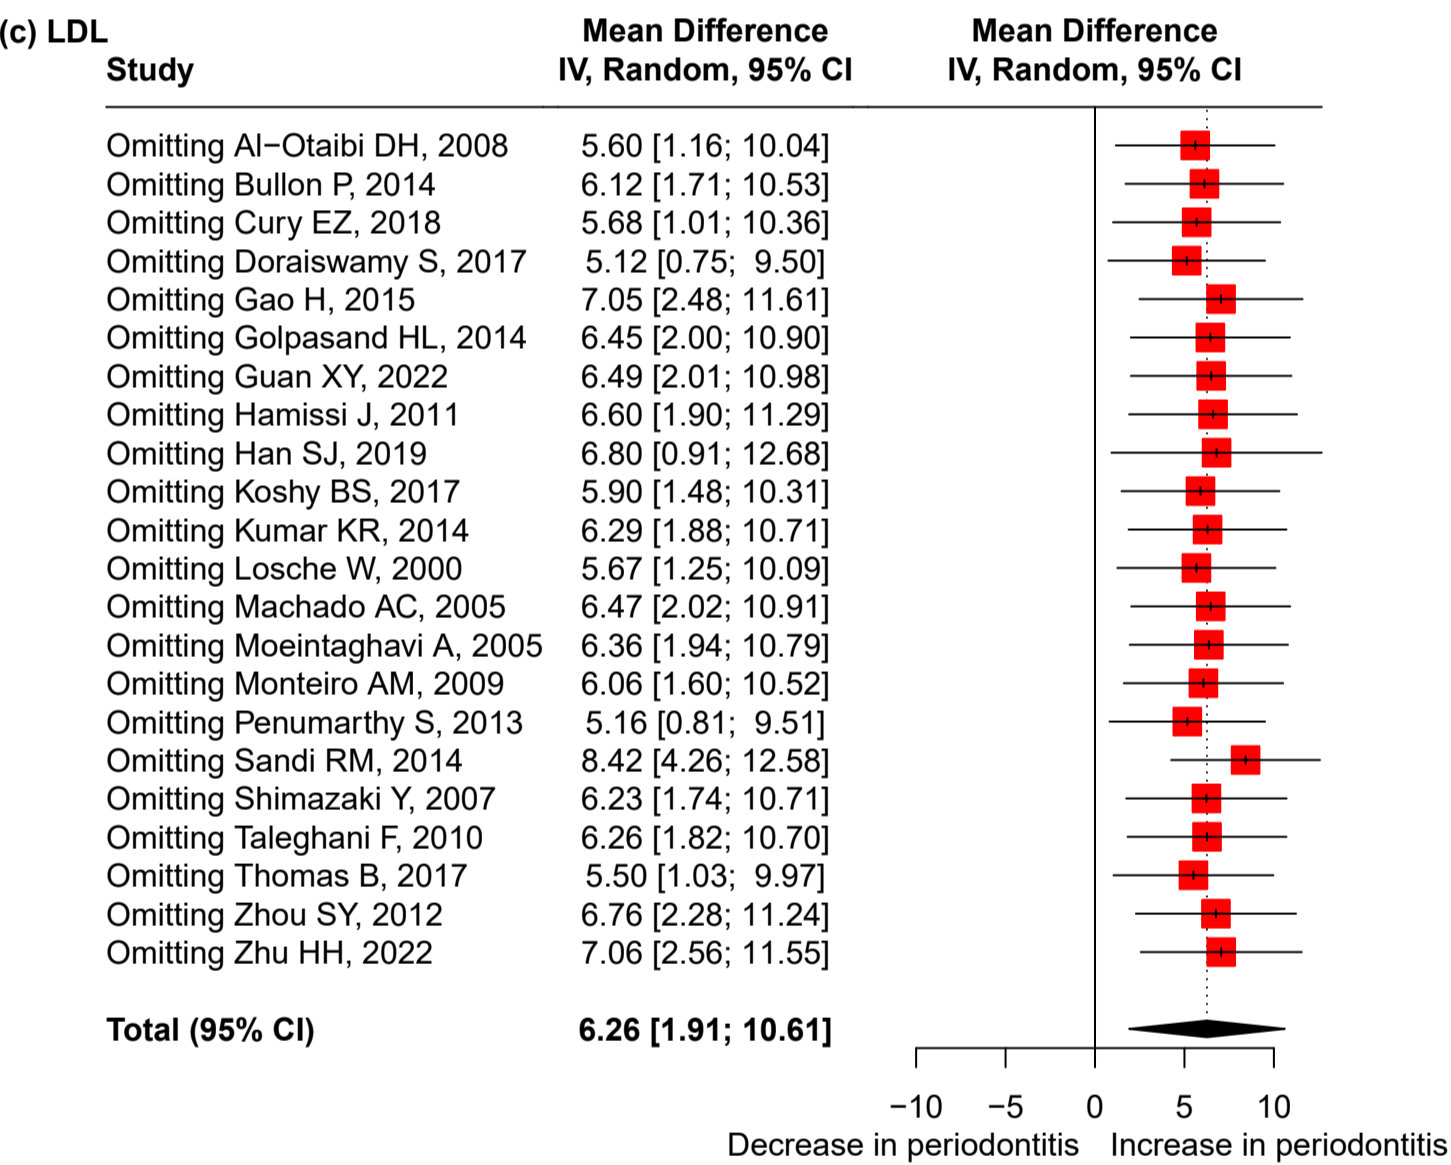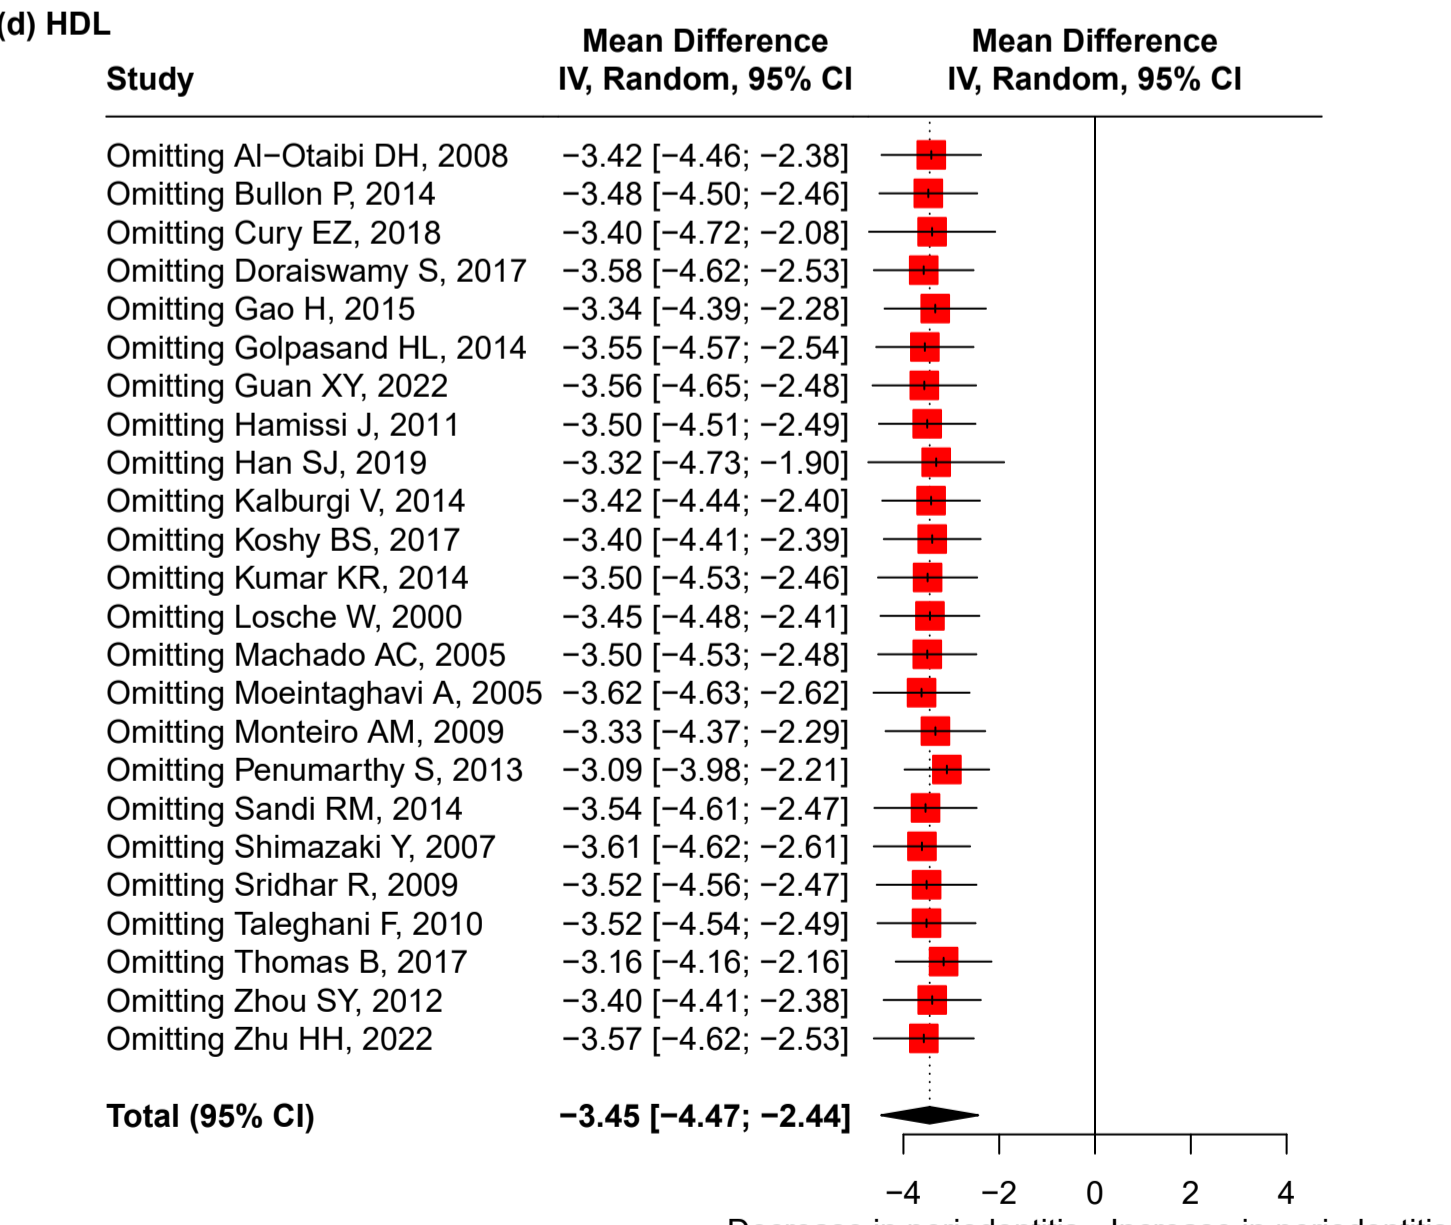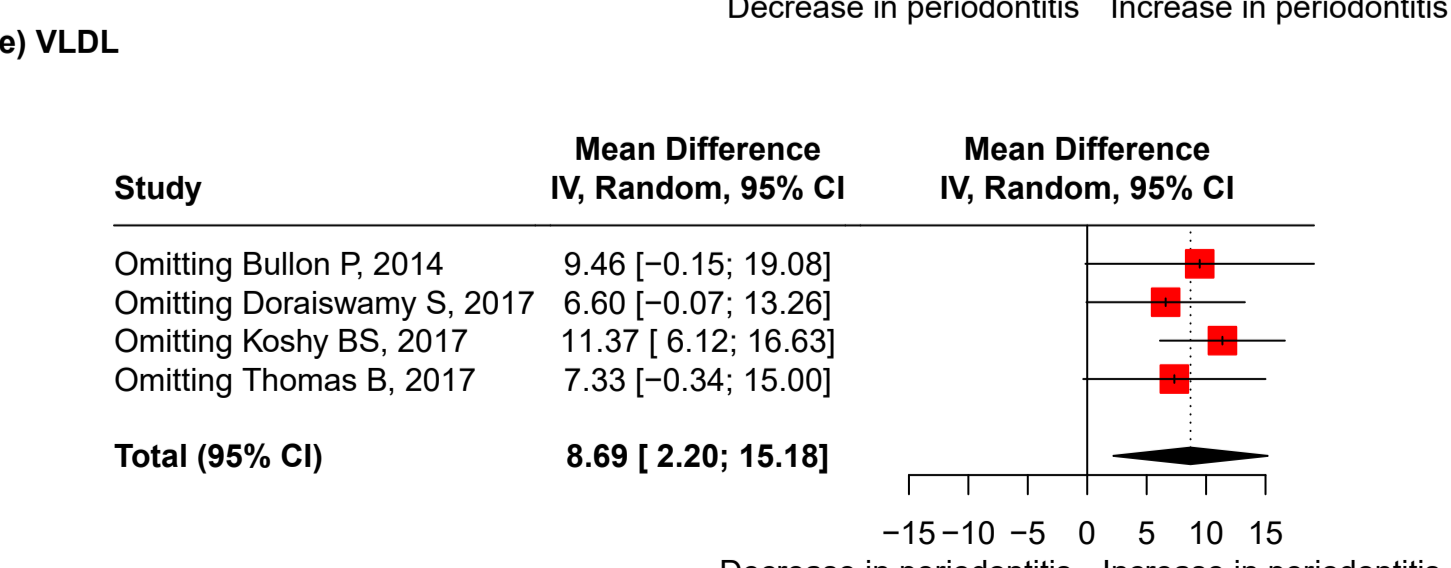

**Supplementary Figure 1. Sensitivity analysis of mean difference of lipids levels for comparisons: periodontitis versus non-periodontitis.** (a) TC; (b) TG; (c) LDL; (d) HDL; (e) VLDL. Sensitivity analyses were conducted using the leave-one-out method, which removes one study each time and repeats the analysis. The results were robust regardless if any one study was omitted except for VLDL comparison. TC: Total cholesterol, TG: triglycerides, LDL: low-density lipoprotein, HDL: high-density lipoprotein, VLDL: very low density lipoprotein
