# Supplementary material for: Exploring the bi-directional relationship between periodontitis and dyslipidemia: a comprehensive systematic review and meta-analysis
Source: PubMed Central journal article supplement (PMC11059608; doi:10.1186/s12903-023-03668-7), 2024-04-29
Supplement: 12903_2023_3668_MOESM9_ESM.pdf [file 12903_2023_3668_MOESM9_ESM.pdf]

**(a) TC**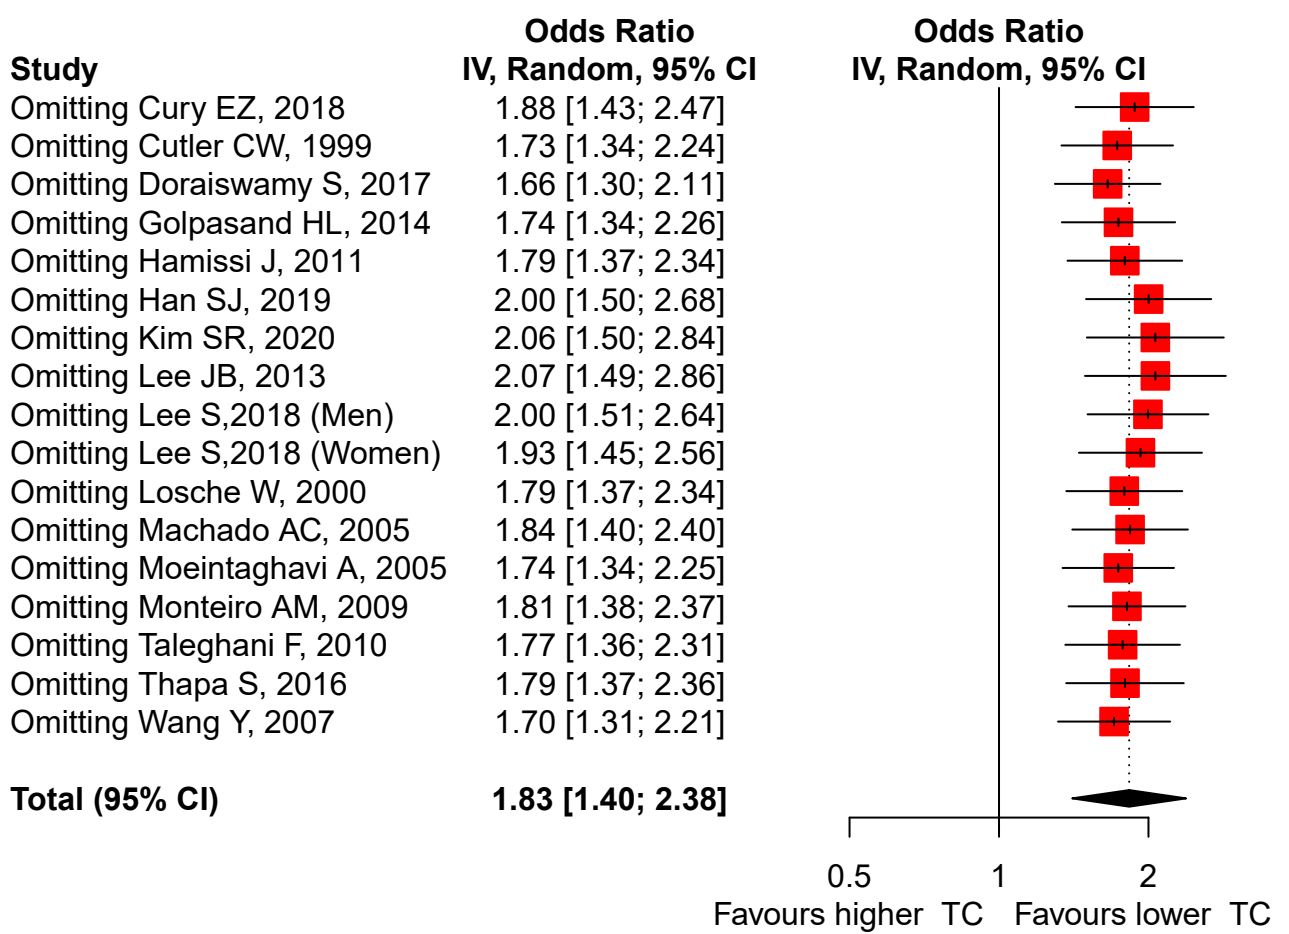**(b) TG**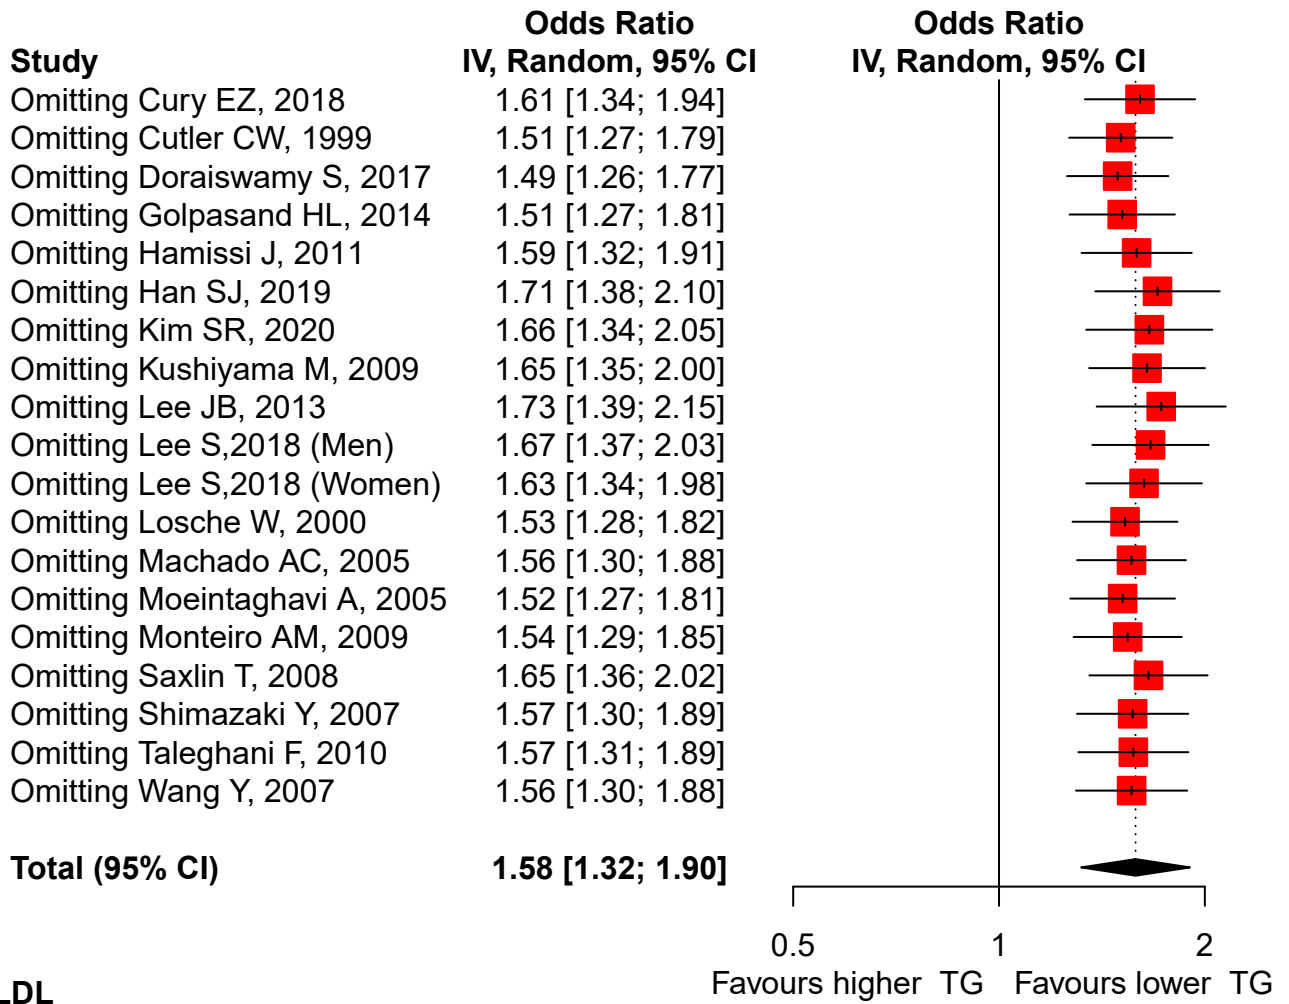**(c) LDL**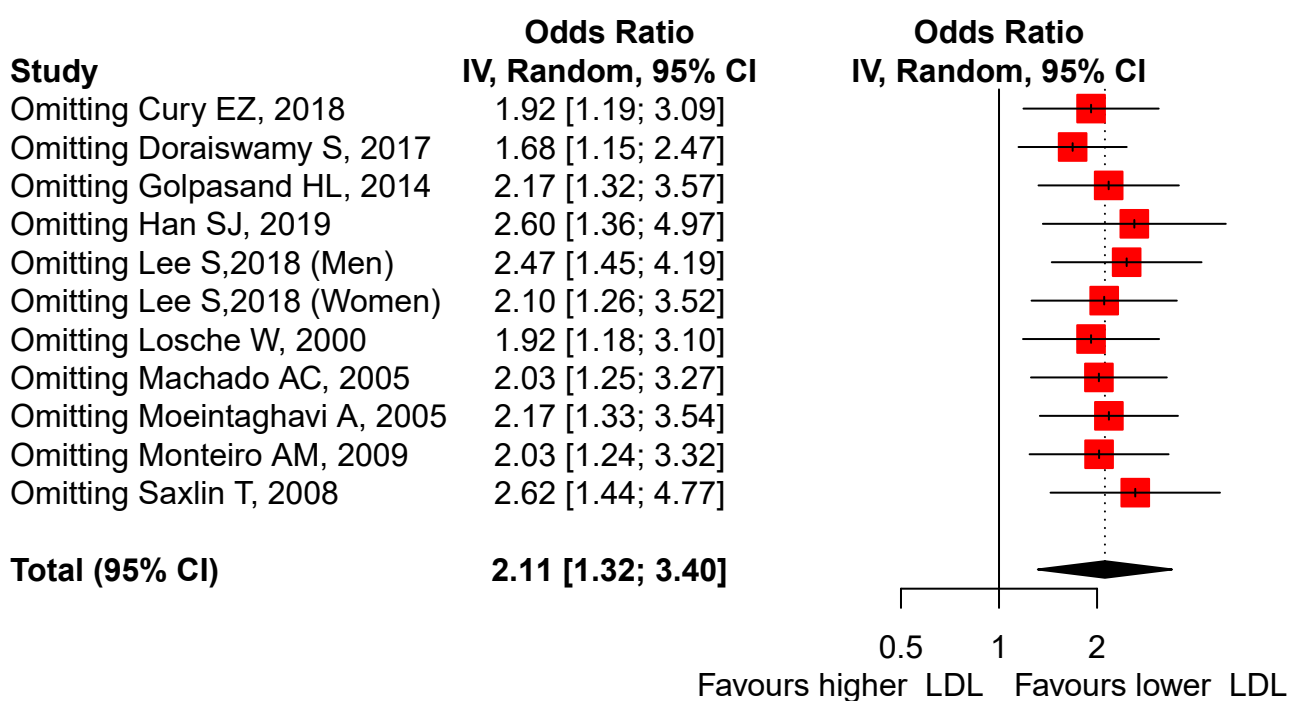**(d) HDL**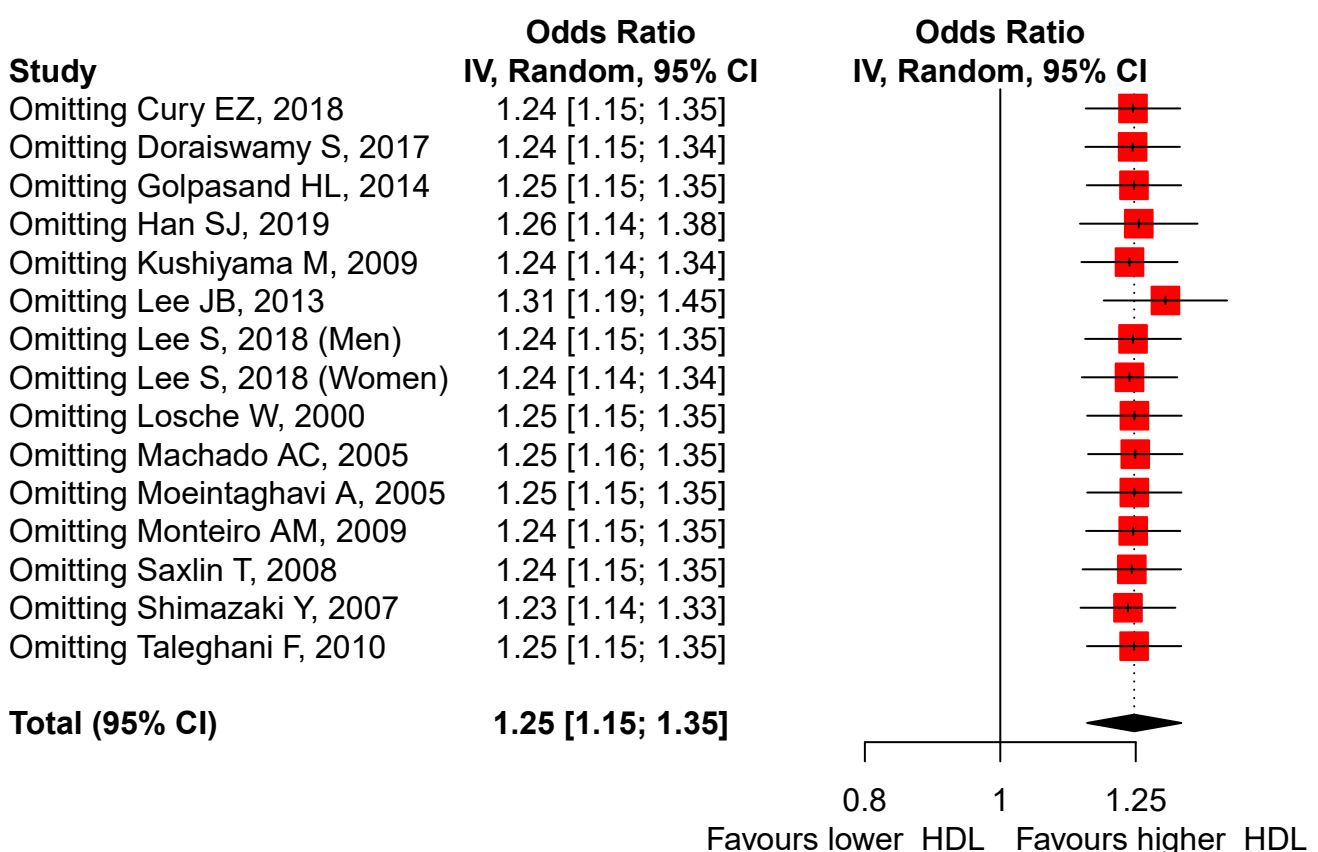

**Supplementary Figure 2. Sensitivity analysis of OR values for different lipids levels with the risk of periodontitis.** (a) TC; (b) TG; (c) LDL; (d) HDL. Sensitivity analyses were conducted using the leave-one-out method, which removes one study each time and repeats the analysis. The results were robust regardless if any one study was omitted. TC: Total cholesterol, TG: triglycerides, LDL: low-density lipoprotein, HDL: high-density lipoprotein
