# Supplementary material for: Exploring the bi-directional relationship between periodontitis and dyslipidemia: a comprehensive systematic review and meta-analysis
Source: PubMed Central journal article supplement (PMC11059608; doi:10.1186/s12903-023-03668-7), 2024-04-29
Supplement: 12903_2023_3668_MOESM10_ESM.pdf [file 12903_2023_3668_MOESM10_ESM.pdf]

### (a) Hyper TG

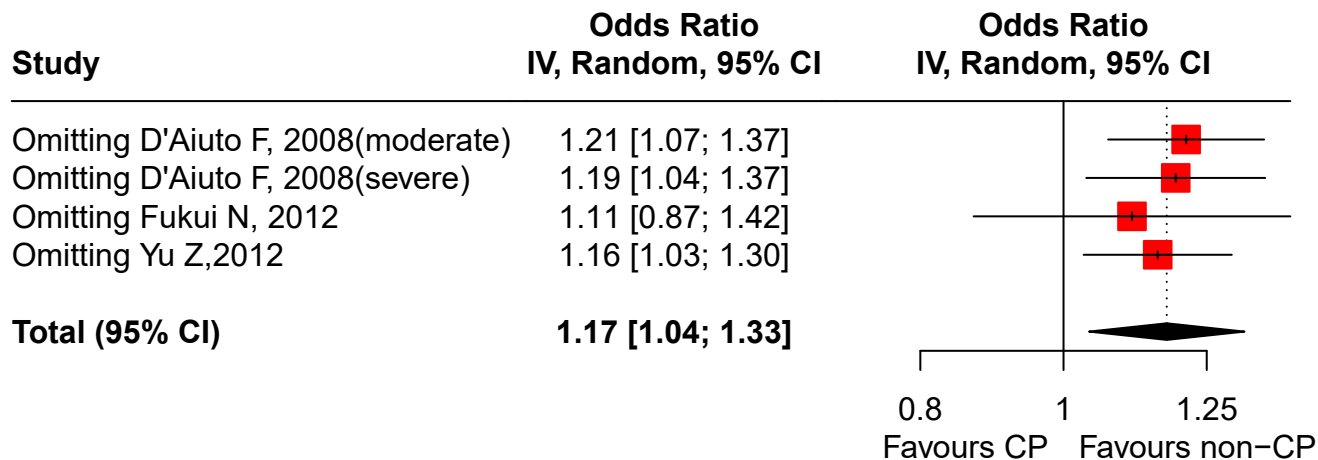

### (b) Low HDL

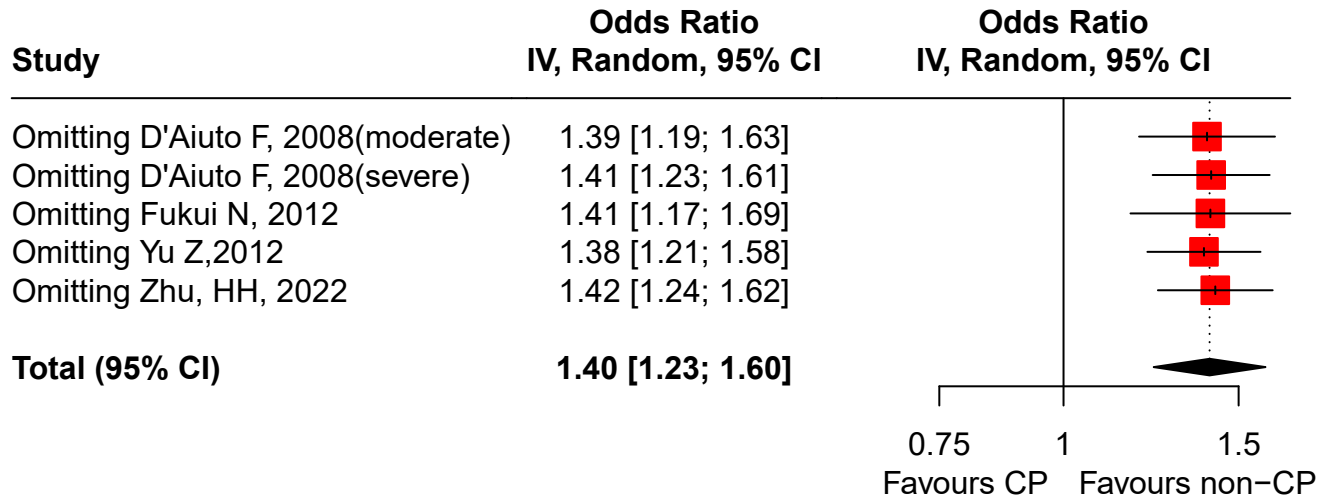

**Supplementary Figure 3. Sensitivity analysis of OR values for periodontitis with the risk of dyslipidemia.** (a) hyper TG; (b) low HDL. Sensitivity analyses were conducted using the leave-one-out method, which removes one study each time and repeats the analysis. The results were robust regardless if any one study was omitted. TG: triglycerides, HDL: high-density lipoprotein, CP: Chronic Periodontitis
