# Supplementary material for: Exploring the bi-directional relationship between periodontitis and dyslipidemia: a comprehensive systematic review and meta-analysis
Source: PubMed Central journal article supplement (PMC11059608; doi:10.1186/s12903-023-03668-7), 2024-04-29
Supplement: 12903_2023_3668_MOESM12_ESM.pdf [file 12903_2023_3668_MOESM12_ESM.pdf]

**(a1) TC – baseline**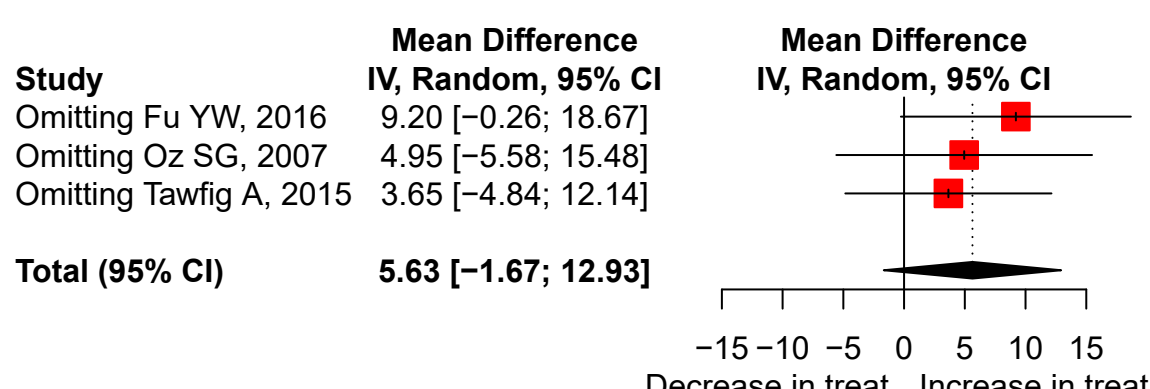**(a2) TC – after 3 months**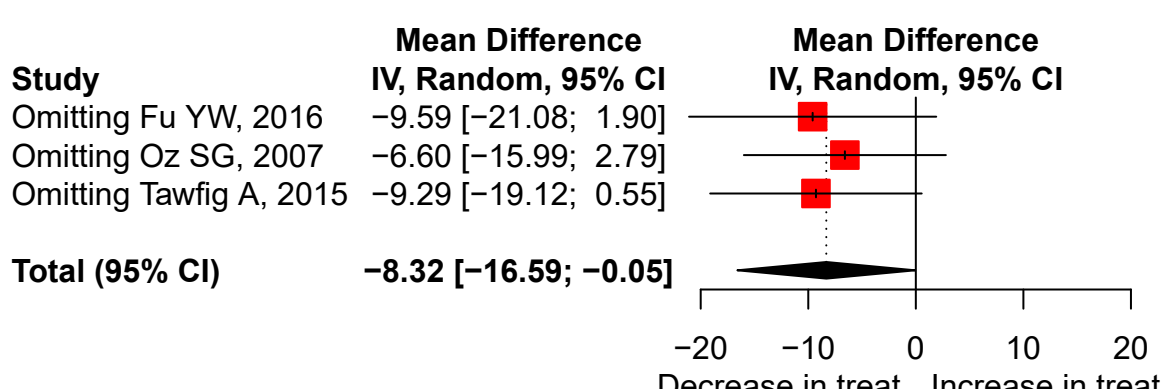**(b1) TG – baseline**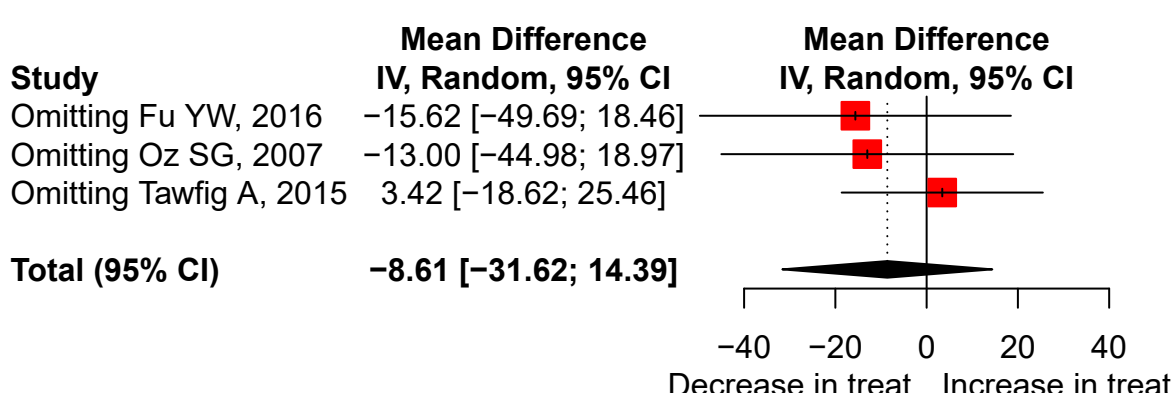**(b2) TG – after 3 months**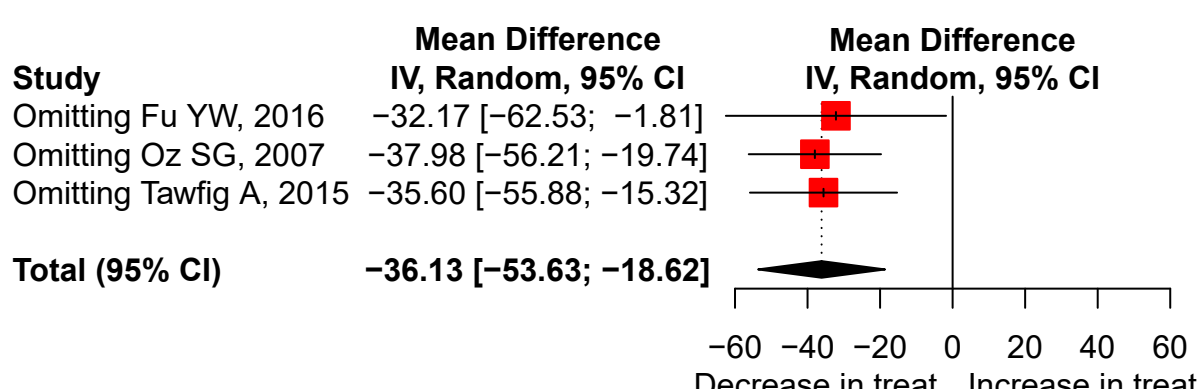**(c1) HDL – baseline**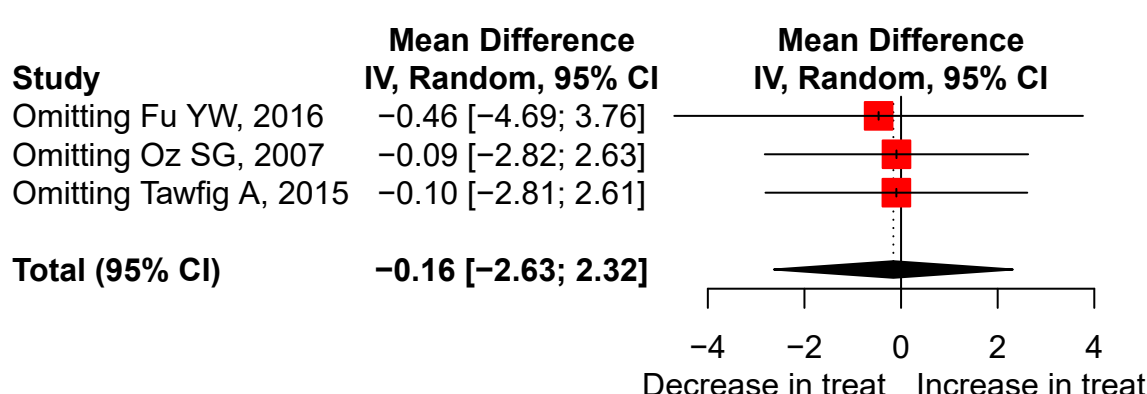**(c2) HDL – after 3 months**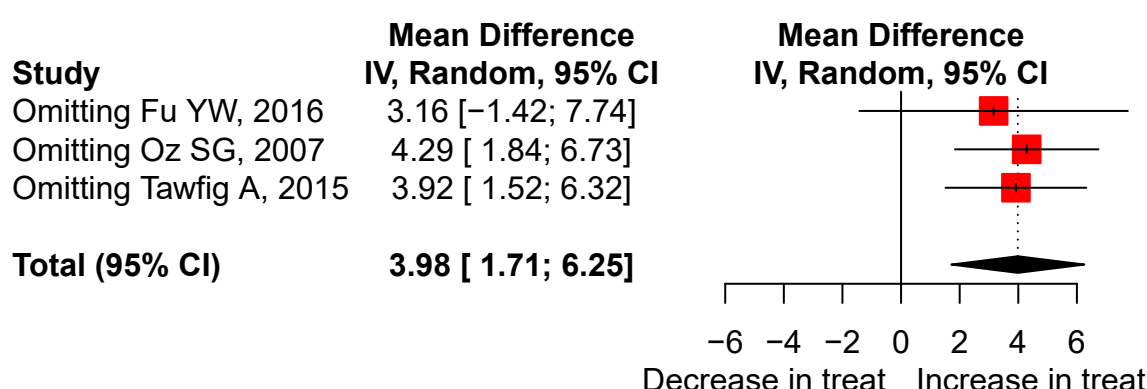**(d1) LDL – baseline**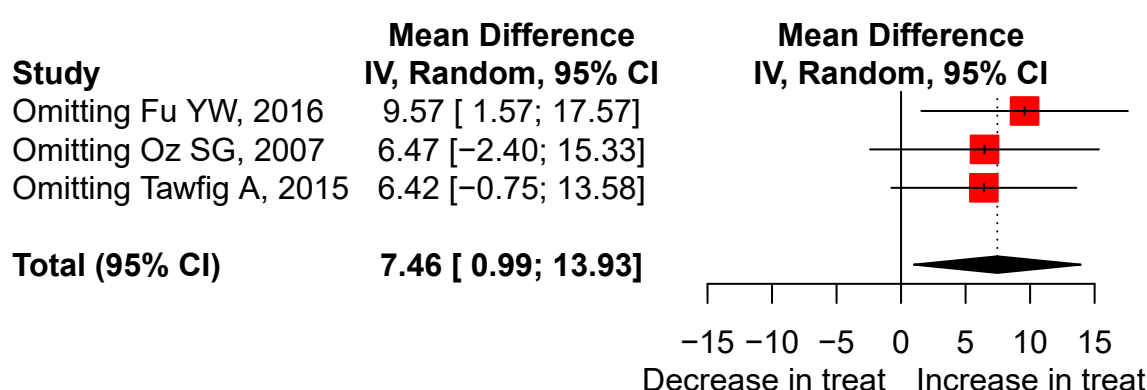**(d2) LDL – after 3 months**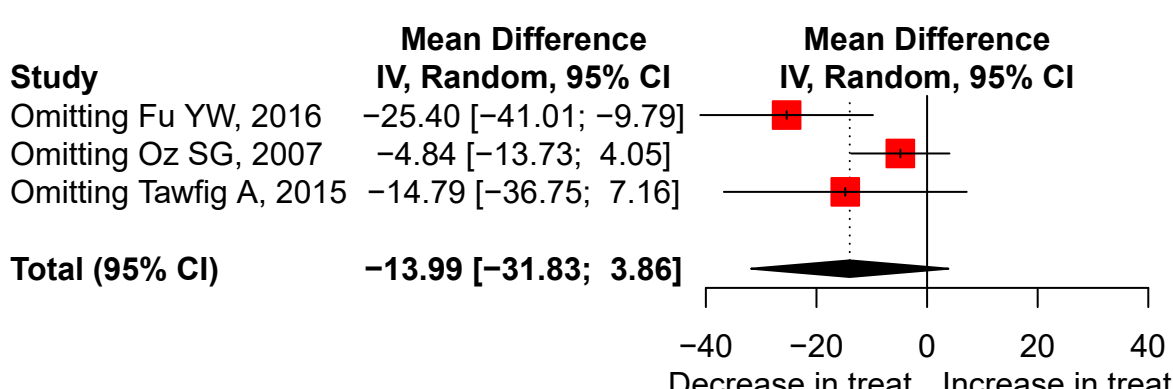

**Supplementary Figure 5. Sensitivity analysis of mean difference for comparisons: periodontal treatment versus non-treatment among periodontitis patients.** (a1-a2) TC; (b1-b2) TG; (c1-c2) HDL; (d1-d2) LDL. Sensitivity analyses were conducted using the leave-one-out method, which removes one study each time and repeats the analysis. The results were robust regardless if any one study was omitted for TC and TG comparisons. Abbreviations: TC: Total cholesterol, TG: triglycerides, HDL: high-density lipoprotein, LDL: low-density lipoprotein
