# Supplementary material for: Exploring the bi-directional relationship between periodontitis and dyslipidemia: a comprehensive systematic review and meta-analysis
Source: PubMed Central journal article supplement (PMC11059608; doi:10.1186/s12903-023-03668-7), 2024-04-29
Supplement: 12903_2023_3668_MOESM13_ESM.pdf [file 12903_2023_3668_MOESM13_ESM.pdf]

**(a) PD**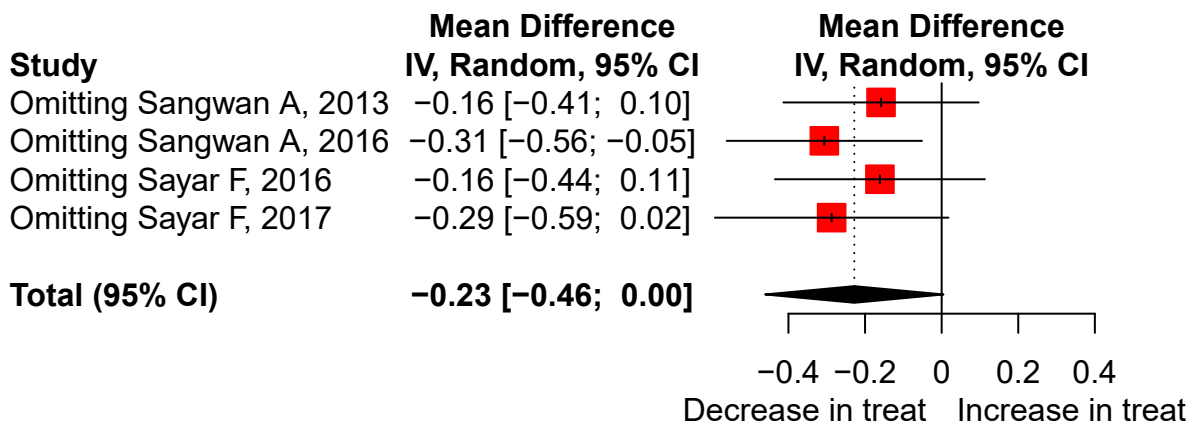**(b) CAL**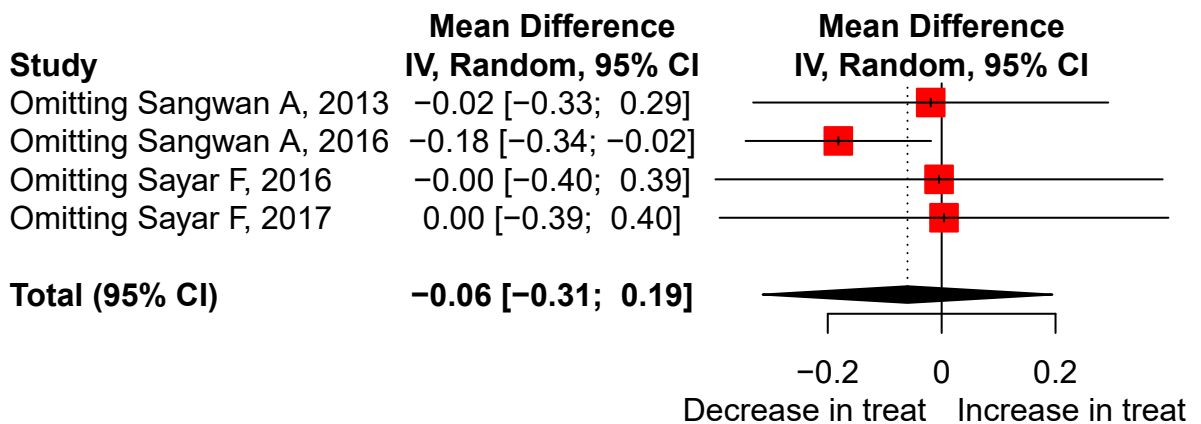**(c) PI**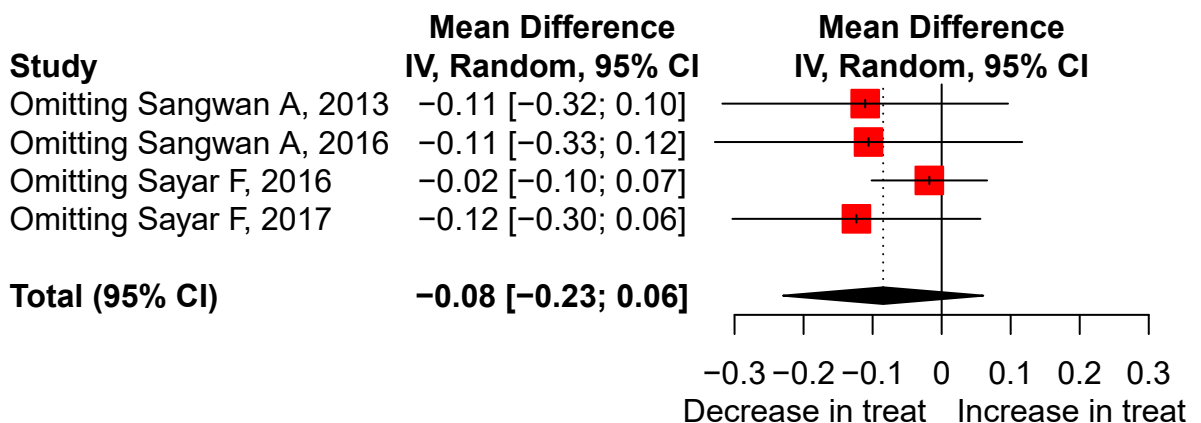

**Supplementary Figure 6. Sensitivity analysis of mean difference for comparisons: lipid-lowering treatment versus non-treatment among hyperlipidemia patients.** (a)PD; (b)CAL; (c)PI. Sensitivity analyses were conducted using the leave-one-out method, which removes one study each time and repeats the analysis. The results were robust regardless if any one study was omitted for PI comparison. PD: probing depth, CAL: clinical attachment level, PI: plaque index
